# Supplementary material
Source: publisher figshare collection journal article supplement (https://asha.figshare.com/articles/dataset/_/24168201)
Supplement: Supplementary file 1 [file 1]

## Supplemental Material S2. Data extraction form.

The data extraction form was developed, based on the Cochrane checklist of items to consider in data collection (Li et al., 2021). Relevant data from each of the included studies was extracted and recorded in Microsoft Access.

|                                                                                                                                                                                               |
|-----------------------------------------------------------------------------------------------------------------------------------------------------------------------------------------------|
| <b>1. Study design</b>                                                                                                                                                                        |
| Study aim                                                                                                                                                                                     |
| Study design (e.g., cluster, cross-over)                                                                                                                                                      |
| Recruitment and sampling                                                                                                                                                                      |
| Was there randomization?<br>If yes, how was it achieved? If no, how were groups allocated?                                                                                                    |
| Was there blinding?                                                                                                                                                                           |
| Sequence generation and concealment                                                                                                                                                           |
| Incomplete outcome data/selective outcome reporting?                                                                                                                                          |
| Enrolment start/end                                                                                                                                                                           |
| Duration of follow-up                                                                                                                                                                         |
| <b>2. Population</b>                                                                                                                                                                          |
| Inclusion criteria                                                                                                                                                                            |
| Exclusion criteria                                                                                                                                                                            |
| Total number (N)                                                                                                                                                                              |
| Population description (including diagnostic characteristics & disease severity)                                                                                                              |
| Setting                                                                                                                                                                                       |
| Region/countries involved                                                                                                                                                                     |
| Baseline characteristics<br>Age<br>Sex<br>Comorbidities<br>Socio-economic status<br>Ethnicity                                                                                                 |
| <b>3. Intervention and comparator</b>                                                                                                                                                         |
| Number of intervention groups                                                                                                                                                                 |
| Intervention/comparator description<br>Components<br>Delivery method<br>Timing/intensity/frequency<br>Duration of treatment                                                                   |
| Implementation description<br>Format and content<br>Staffing and equipment                                                                                                                    |
| Intervention/comparator integrity/fidelity/compliance                                                                                                                                         |
| Co-interventions (for intervention and comparator arm)                                                                                                                                        |
| <b>4. Utility measures outcomes</b>                                                                                                                                                           |
| <b>Overview</b>                                                                                                                                                                               |
| Measurement instrument (e.g., CHU9D)<br>Name of instrument<br>Unit of measurement<br>Upper/lower limits<br>Whether high or low is favourable<br>Clinical thresholds<br>Relevance to study aim |

|                                                                                                                                   |
|-----------------------------------------------------------------------------------------------------------------------------------|
| Metric (e.g., change pre/post intervention)                                                                                       |
| Timing of outcome measurements                                                                                                    |
| Method of collection                                                                                                              |
| Method of aggregation (e.g., mean & <i>SD</i> ; proportion with condition)                                                        |
| Between group estimate (e.g., <i>RR</i> , <i>OR</i> , mean difference)                                                            |
| <b>At each time point</b>                                                                                                         |
| Description (e.g., baseline, 6 months, 12 months)                                                                                 |
| Number of participants:<br>In each intervention<br>Censored (withdrawn/lost to follow-up)                                         |
| Result - summary data (e.g., mean & <i>SD</i> )                                                                                   |
| Estimate of effect (effect size, 95% CI, <i>p</i> value)                                                                          |
| <b>Summary/conclusion</b>                                                                                                         |
| Is there any variation in measurement or reporting of the outcome?                                                                |
| Content available/appropriate for meta-analysis?                                                                                  |
| Were subgroup analyses conducted?                                                                                                 |
| <b>5. Outcomes - cost</b>                                                                                                         |
| Analytic perspective (e.g., health system)                                                                                        |
| Time horizon                                                                                                                      |
| Setting (i.e., study country)                                                                                                     |
| Context and relevance                                                                                                             |
| Cost items included, grouped as:<br>Health sector<br>Other sector (e.g., education)<br>Patient and family<br>Productivity impacts |
| Resource use (e.g., number of speech path visits)                                                                                 |
| Unit costs (currency, price year) (e.g., cost per speech path visit)                                                              |
| Discount rate                                                                                                                     |
| <b>6. Miscellaneous</b>                                                                                                           |
| Key conclusions & limitations noted by the study authors                                                                          |
| Miscellaneous comments from study authors                                                                                         |
| References to relevant studies                                                                                                    |
| Generalisability of the results                                                                                                   |
| Funding source                                                                                                                    |
| Conflicts of interest                                                                                                             |
| Correspondence with study authors required?                                                                                       |
| Study quality notes (ethical approval, sample size calculation)                                                                   |
