# Supplementary material
Source: publisher figshare collection journal article supplement (https://asha.figshare.com/articles/dataset/_/24168201)
Supplement: Supplementary file 2 [file 1]

## Supplemental Material S1. Search terms.

### Search term mapping

Embase subject headings were mapped to subject headings or topics in CINAHL, ProQuest, and Web of Science (Tables S1 and S2).

Title/abstract/keyword searches were used in place of subject heading searches in Scopus, PEDE, NHS EED, and the Cochrane Library, which do not use subject headings or topics to index records. Word variations were searched on all lines of the Cochrane Library search. PEDE, NHS EED, ANZCTR, ClinicalTrials.gov, and OpenGrey had limited search functionality and a small number of results. Searches of these databases were truncated after combining the population search terms and results exported for title/abstract review.

Table S1. Quality of life search term mapping from Embase to CINAHL, ProQuest, and Web of Science.

| Embase 'subject heading'   | CINAHL 'subject heading'    | ProQuest 'mainsubject' | Web of Science 'topic'                                     |
|----------------------------|-----------------------------|------------------------|------------------------------------------------------------|
| Fluency disorder           | Fluency Disorders           | No subject heading     | Fluency disorder*                                          |
| Stuttering                 | No subject heading          | Stuttering             | Stuttering                                                 |
| Therapy                    | Therapeutics+               | Therapy                | Therapy                                                    |
| Clinical outcome           | No subject heading          | Clinical outcomes      | Clinical outcome*                                          |
| Outcome variable           | Dependent Variable          | Clinical outcomes      | Outcome variable*                                          |
| Outcome assessment         | Outcome Assessment          | Clinical outcomes      | Outcome assessment*                                        |
| Treatment outcome          | Treatment Outcome+          | Clinical outcomes      | Treatment outcome*                                         |
| Patient-reported outcome   | Patient-Reported Outcomes+  | No subject heading     | Patient-reported outcome* OR Patient reported outcome*     |
| Quality of life            | Quality of Life+            | Quality of life        | Quality of life                                            |
| Quality adjusted life year | Quality-Adjusted Life Years | No subject heading     | Quality-adjusted life year* or Quality adjusted life year* |

Table S2. Quality of life search term mapping from Embase to CINAHL, ProQuest, and Web of Science.

| Embase 'subject heading' | CINAHL 'subject heading'                          | ProQuest 'mainsubject'                                                                 | Web of Science 'topic'                                                                                                                  |
|--------------------------|---------------------------------------------------|----------------------------------------------------------------------------------------|-----------------------------------------------------------------------------------------------------------------------------------------|
| Fluency disorder         | Fluency Disorders                                 | No subject heading                                                                     | Fluency disorder*                                                                                                                       |
| Stuttering               | No subject heading                                | Stuttering                                                                             | Stuttering                                                                                                                              |
| Disease burden           | No subject heading                                | No subject heading                                                                     | Disease burden                                                                                                                          |
| Caregiver burden         | Caregiver Burden                                  | No subject heading                                                                     | Caregiver burden                                                                                                                        |
| Health care cost         | Health Resource Utilization OR Health Care Costs+ | Health care expenditures                                                               | Health care cost* OR Healthcare cost*                                                                                                   |
| Cost                     | No subject heading                                | Cost                                                                                   | Not used <sup>c</sup>                                                                                                                   |
| Cost of illness          | Economic Aspects of Illness                       | Cost of illness                                                                        | Cost of illness                                                                                                                         |
| Education                | Outcomes of Education <sup>a</sup>                | Academic achievement OR Academic underachievement OR Education attainment <sup>b</sup> | Outcomes of education OR Education outcomes OR Academic achievement OR Academic underachievement OR Educational attainment <sup>d</sup> |
| Occupation               | Occupations and Professions+                      | Occupations                                                                            | Occupation                                                                                                                              |
| Employment               | Employment+                                       | Employment                                                                             | Employment                                                                                                                              |
| Attitude                 | Attitude+                                         | Attitudes                                                                              | Not used <sup>c</sup>                                                                                                                   |
| Personnel management     | Personnel Management+                             | Personnel management                                                                   | Not used <sup>c</sup>                                                                                                                   |
| Mental Health            | Mental Health                                     | Mental health                                                                          | Mental health                                                                                                                           |
| Human relation           | No subject heading                                | Human relations                                                                        | Human relation*                                                                                                                         |
| Productivity             | Productivity                                      | Productivity                                                                           | Productivity                                                                                                                            |
| Social aspect            | No subject heading                                | No subject heading                                                                     | Social aspect*                                                                                                                          |

<sup>a</sup> Education+ subject heading expanded; outcomes of education selected from list of sub-headings

<sup>b</sup> Education subject heading expanded; academic achievement, academic underachievement, and education attainment selected from list of sub-headings.

<sup>c</sup> Topic returned many irrelevant results. Title/abstract used instead.

<sup>d</sup> Education topic expanded; outcomes of education, education outcomes, academic achievement, academic underachievement, and educational attainment selected as topics, consistent with CINAHL and ProQuest subject headings.

## Quality of Life search terms

Tables S3 to S8 detail the quality of life search terms used for Embase, CINAHL, ProQuest, Web of Science, Scopus, and the Cochrane Library.

Table S3. Quality of Life search terms used in Embase.

| <b>Databases:</b> Embase (1974 to 2021 January 15), Ovid MEDLINE ® ALL (1946 to January 15, 2021) & APA PsycInfo 1806 to January Week 2 2021 |                                                                                                                  |            |
|----------------------------------------------------------------------------------------------------------------------------------------------|------------------------------------------------------------------------------------------------------------------|------------|
| <b>Search date:</b> 20-Jan-21                                                                                                                |                                                                                                                  |            |
| #                                                                                                                                            | Search terms                                                                                                     | Results    |
| 1                                                                                                                                            | fluency disorder/ or stuttering/                                                                                 | 13,680     |
| 2                                                                                                                                            | (stuttering or stammering or disfluency).kw. or (stuttering or stammering or disfluency).tw.                     | 14,504     |
| 3                                                                                                                                            | 1 or 2                                                                                                           | 17,350     |
| 4                                                                                                                                            | intervention.kw. or intervention.tw.                                                                             | 1,844,627  |
| 5                                                                                                                                            | treat*.kw. or treat*.tw.                                                                                         | 14,205,344 |
| 6                                                                                                                                            | therapy/                                                                                                         | 1,328,181  |
| 7                                                                                                                                            | 4 or 5 or 6                                                                                                      | 16,037,827 |
| 8                                                                                                                                            | clinical outcome/ or outcome variable/ or outcome assessment/ or treatment outcome/ or patient-reported outcome/ | 2,602,676  |
| 9                                                                                                                                            | quality of life/                                                                                                 | 737,668    |
| 10                                                                                                                                           | quality adjusted life year/                                                                                      | 40,878     |
| 11                                                                                                                                           | health related outcome*.tw. or health related outcome*.kw.                                                       | 5,267      |
| 12                                                                                                                                           | 8 or 9 or 10 or 11                                                                                               | 3,235,601  |
| 13                                                                                                                                           | 3 and 7 and 12                                                                                                   | 751        |
| 14                                                                                                                                           | remove duplicates from 13                                                                                        | 516        |

Explanatory notes: / = subject heading; \* = unlimited truncation (i.e., unlimited suffix variations); (...) = limiter; kw = keyword heading; tw = text word (includes title, abstract, and drug trade name).

Table S4. Quality of Life search terms used in CINAHL.

| <b>Databases:</b> CINAHL Complete |              |         |
|-----------------------------------|--------------|---------|
| <b>Search date:</b> 22-Feb-21     |              |         |
| #                                 | Search terms | Results |

|    |                                                                                              |           |
|----|----------------------------------------------------------------------------------------------|-----------|
| 1  | (MH "Fluency Disorders")                                                                     | 3,166     |
| 2  | TI stuttering or fluency disorder or stammering or dysfluency                                | 1,486     |
| 3  | AB stuttering or fluency disorder or stammering or dysfluency                                | 1,487     |
| 4  | 1 or 2 or 3                                                                                  | 3,424     |
| 5  | TI intervention or AB intervention                                                           | 424,759   |
| 6  | TI treat* or AB treat*                                                                       | 1,080,074 |
| 7  | (MH "Therapeutics+")                                                                         | 1,585,326 |
| 8  | 5 or 6 or 7                                                                                  | 2,541,569 |
| 9  | TI clinical outcome or AB clinical outcome                                                   | 75,289    |
| 10 | (MH "Dependent Variable")                                                                    | 2,957     |
| 11 | (MH "Outcome Assessment") or (MH "Treatment Outcomes+") or (MH "Patient-Reported Outcomes+") | 428,083   |
| 12 | (MH "Quality of Life+")                                                                      | 125,305   |
| 13 | (MH "Quality-Adjusted Life Years")                                                           | 5,025     |
| 14 | TI health related outcome* or AB health related outcome*                                     | 5,087     |
| 15 | 9 or 10 or 11 or 12 or 13 or 14                                                              | 587,035   |
| 16 | 4 and 8 and 15                                                                               | 314       |

Explanatory notes: \* = truncation wildcard (i.e., unlimited suffix variations); + = explode subject heading; (...) = limiter; "..." = exact phrase; AB = abstract; MH = exact subject heading; TI = title.

Table S5. Quality of Life search terms used in ProQuest.

| Databases: ProQuest    |                                                                                          |            |
|------------------------|------------------------------------------------------------------------------------------|------------|
| Search date: 26-Feb-21 |                                                                                          |            |
| #                      | Search terms                                                                             | Results    |
| 1                      | MAINSUBJECT.EXACT("stuttering")                                                          | 6,150      |
| 2                      | AB(stuttering or stammering or disfluency) or TI(stuttering or stammering or disfluency) | 13,878     |
| 3                      | 1 or 2                                                                                   | 15,128     |
| 4                      | AB(intervention) or TI(intervention)                                                     | 2,054,834  |
| 5                      | AB(treat*) or ti(treat*)                                                                 | 12,202,146 |
| 6                      | MAINSUBJECT.EXACT("therapy")                                                             | 77,618     |
| 7                      | 4 or 5 or 6                                                                              | 13,696,514 |
| 8                      | MAINSUBJECT.EXACT("Clinical outcomes")                                                   | 47,463     |
| 9                      | AB(patient reported outcome) or TI(patient reported outcome)                             | 240,347    |

|    |                                                                  |         |
|----|------------------------------------------------------------------|---------|
| 10 | MAINSUBJECT.EXACT("Quality of life")                             | 354,124 |
| 11 | AB(quality adjusted life year) or TI(quality adjusted life year) | 28,738  |
| 12 | AB(health related outcome) or TI(health related outcome)         | 152,245 |
| 13 | 8 or 9 or 10 or 11 or 12                                         | 744,537 |
| 14 | 3 and 7 and 13                                                   | 123     |

Explanatory notes: \* = truncation (up to 500 word variations); (...) = limiter; "..." = exact phrase; AB = abstract; MAINSUBJECT.EXACT = exact subject heading; TI = title.

Table S6. Quality of Life search terms used in Web of Science.

| Database: Web of Science (All years, 1864-2021) |                                                                                                                                                                 |            |
|-------------------------------------------------|-----------------------------------------------------------------------------------------------------------------------------------------------------------------|------------|
| Search date: 27-Feb-21                          |                                                                                                                                                                 |            |
| #                                               | Search terms                                                                                                                                                    | Results    |
| 1                                               | TS=("fluency disorder*") or TS=(stuttering)                                                                                                                     | 9,146      |
| 2                                               | TI=(stuttering or stammering or disfluency) or AB=(stuttering or stammering or disfluency)                                                                      | 9,293      |
| 3                                               | 1 or 2                                                                                                                                                          | 10,434     |
| 4                                               | TI=(intervention) or AB=(intervention)                                                                                                                          | 1,441,805  |
| 5                                               | TI=(treat*) or AB=(treat*)                                                                                                                                      | 9,534,163  |
| 6                                               | TS=(therapy)                                                                                                                                                    | 11,596,190 |
| 7                                               | 4 or 5 or 6                                                                                                                                                     | 17,618,885 |
| 8                                               | TS=("clinical outcome*" or "outcome variable*" or "outcome* assessment*" or "treatment outcome*" or "patient-reported outcome*" or "patient reported outcome*") | 1,382,075  |
| 9                                               | TS=("quality of life")                                                                                                                                          | 604,326    |
| 10                                              | TS=("quality adjusted life year*" or "quality-adjusted life year*")                                                                                             | 21,227     |
| 11                                              | TI=("health related outcome*") or AB=("health related outcome*")                                                                                                | 2,350      |
| 12                                              | 8 or 9 or 10 or 11                                                                                                                                              | 1,895,176  |
| 13                                              | 3 and 7 and 12                                                                                                                                                  | 496        |

Explanatory notes: \* = wildcard for right hand truncation (any group of suffix characters, including no character); (...) = limiter to override operator precedence; "..." = exact phrase; AB = abstract; TI = title; TS = topic.

Table S7. Quality of Life search terms used in Scopus.

| Database: Scopus (All years) |  |
|------------------------------|--|
| Search date: 02-Mar-21       |  |

| #  | Search terms                                                                                                                                                               | Results    |
|----|----------------------------------------------------------------------------------------------------------------------------------------------------------------------------|------------|
| 1  | TITLE-ABS-KEY ("fluency disorder*" or stuttering)                                                                                                                          | 8,230      |
| 2  | TITLE-ABS (stuttering OR stammering or disfluency)                                                                                                                         | 7,421      |
| 3  | 1 or 2                                                                                                                                                                     | 9,469      |
| 4  | TITLE-ABS (intervention)                                                                                                                                                   | 1,360,735  |
| 5  | TITLE-ABS (treat*)                                                                                                                                                         | 8,598,971  |
| 6  | TITLE-ABS-KEY (therapy)                                                                                                                                                    | 4,659,707  |
| 7  | 4 or 5 or 6                                                                                                                                                                | 11,885,688 |
| 8  | TITLE-ABS-KEY ("clinical outcome*" or "outcome variable*" or "outcome* assessment*" or "treatment outcome*" or "patient-reported outcome*" or "patient reported outcome*") | 2,015,330  |
| 9  | TITLE-ABS-KEY ("quality of life")                                                                                                                                          | 539,489    |
| 10 | TITLE-ABS-KEY ("quality adjusted life year" or "quality-adjusted life year")                                                                                               | 25,642     |
| 11 | TITLE-ABS ("health related outcome*")                                                                                                                                      | 2,207      |
| 12 | 8 or 9 or 10 or 11                                                                                                                                                         | 2,245,159  |
| 13 | 3 and 7 and 12                                                                                                                                                             | 616        |

Explanatory notes: \* = wildcard; (...) = limiter; “...” = loose phrase (exact words, ignores punctuation); TITLE-ABS = article title or abstract; TITLE-ABS-KEY = article title or abstract or keywords.

Table S8. Quality of Life search terms used in the Cochrane Library.

| <b>Database:</b> Cochrane Library (including Cochrane Database of Systematic Reviews and Cochrane Central Register of Controlled Trials) |                                                                                            |           |
|------------------------------------------------------------------------------------------------------------------------------------------|--------------------------------------------------------------------------------------------|-----------|
| <b>Search date:</b> 20-May-21                                                                                                            |                                                                                            |           |
| #                                                                                                                                        | Search terms                                                                               | Results   |
| 1                                                                                                                                        | ("fluency disorder" or stuttering):ti,ab,kw                                                | 276       |
| 2                                                                                                                                        | (stuttering or stammering or disfluency):ti or (stuttering or stammering or disfluency):ab | 271       |
| 3                                                                                                                                        | 1 or 2                                                                                     | 291       |
| 4                                                                                                                                        | intervention:ti,ab                                                                         | 422,259   |
| 5                                                                                                                                        | treat*:ti,ab                                                                               | 806,531   |
| 6                                                                                                                                        | therapy:ti,ab,kw                                                                           | 710,888   |
| 7                                                                                                                                        | 4 or 5 or 6                                                                                | 1,212,754 |

|    |                                                                                                                                                                       |         |
|----|-----------------------------------------------------------------------------------------------------------------------------------------------------------------------|---------|
| 8  | ("clinical outcome*" or "outcome variable*" or "outcome* assessment*" or "treatment outcome*" or "patient-reported outcome*" or "patient reported outcome*"):ti,ab,kw | 267,756 |
| 9  | "quality of life":ti,ab,kw                                                                                                                                            | 115,018 |
| 10 | ("quality adjusted life year" or "quality-adjusted life year"):ti,ab,kw                                                                                               | 0       |
| 11 | ("health related outcome*"):ti,ab                                                                                                                                     | 429     |
| 12 | 8 or 9 or 10 or 11                                                                                                                                                    | 0       |
| 13 | 8 or 9 or 11                                                                                                                                                          | 348,994 |
| 14 | 3 and 7 and 12                                                                                                                                                        | 0       |
| 15 | 3 and 7 and 13                                                                                                                                                        | 69      |

Explanatory notes: \* = wildcard to search zero or more characters; (...) = nesting to change search precedence; "..." = phrase search; ab = abstract; kw = keyword; ti = title.

## Cost of illness search terms

Tables S9 to S14 detail the cost search terms used for Embase, CINAHL, ProQuest, Web of Science, Scopus, and the Cochrane Library.

Table S9. Cost search terms used in Embase.

| <b>Databases:</b> Embase (1974 to 2021 January 15), Ovid MEDLINE ® ALL (1946 to January 15, 2021) & APA PsycInfo 1806 to January Week 2 2021 |                                                                                              |           |
|----------------------------------------------------------------------------------------------------------------------------------------------|----------------------------------------------------------------------------------------------|-----------|
| <b>Search date:</b> 19-Jan-21                                                                                                                |                                                                                              |           |
| #                                                                                                                                            | Search terms                                                                                 | Results   |
| 1                                                                                                                                            | fluency disorder/ or stuttering/                                                             | 13,680    |
| 2                                                                                                                                            | (stuttering or stammering or disfluency).kw. or (stuttering or stammering or disfluency).tw. | 14,504    |
| 3                                                                                                                                            | 1 or 2                                                                                       | 17,350    |
| 4                                                                                                                                            | economic.kw. or economic.tw.                                                                 | 614,353   |
| 5                                                                                                                                            | health resource*.kw. or health resource*.tw.                                                 | 18,082    |
| 6                                                                                                                                            | disease burden/ or caregiver burden/                                                         | 36,056    |
| 7                                                                                                                                            | economic burden.kw. or economic burden.tw.                                                   | 32,765    |
| 8                                                                                                                                            | emotional burden.kw. or emotional burden.tw.                                                 | 2,482     |
| 9                                                                                                                                            | "health care cost"/                                                                          | 245,531   |
| 10                                                                                                                                           | "cost"/                                                                                      | 108,319   |
| 11                                                                                                                                           | cost.kw. or cost.tw.                                                                         | 1,126,791 |

|    |                                                                                        |           |
|----|----------------------------------------------------------------------------------------|-----------|
| 12 | "cost of illness"/                                                                     | 47,767    |
| 13 | education/                                                                             | 480,763   |
| 14 | occupation/ or employment/                                                             | 187,403   |
| 15 | attitude/ or personnel management/                                                     | 199,338   |
| 16 | mental health/                                                                         | 256,431   |
| 17 | human relation/                                                                        | 89,318    |
| 18 | productivity/                                                                          | 57,123    |
| 19 | social aspect/                                                                         | 78,028    |
| 20 | 4 or 5 or 6 or 7 or 8 or 9 or 10 or 11 or 12 or 13 or 14 or 15 or 16 or 17 or 18 or 19 | 3,045,646 |
| 21 | 3 and 20                                                                               | 662       |
| 22 | Remove duplicates from 21                                                              | 518       |

Explanatory notes: / = subject heading; \* = unlimited truncation (i.e., unlimited suffix variations); (...) = limiter; "..." = literal string (i.e., an exact phrase); kw = keyword heading; tw = text word (includes title, abstract, and drug trade name).

Table S10. Cost search terms used in CINAHL.

| Database: CINAHL       |                                                               |         |
|------------------------|---------------------------------------------------------------|---------|
| Search date: 22-Feb-21 |                                                               |         |
| #                      | Search terms                                                  | Results |
| 1                      | (MH "Fluency Disorders")                                      | 3,166   |
| 2                      | TI stuttering or fluency disorder or stammering or dysfluency | 1,486   |
| 3                      | AB stuttering or fluency disorder or stammering or dysfluency | 1,487   |
| 4                      | 1 or 2 or 3                                                   | 3,424   |
| 5                      | TI economic or AB economic                                    | 70,268  |
| 6                      | (MH "Health Resource Utilization")                            | 19,592  |
| 7                      | TI health resource* or AB health resource*                    | 18,217  |
| 8                      | TI disease burden or AB disease burden                        | 14,159  |
| 9                      | (MH "Caregiver Burden")                                       | 10,172  |
| 10                     | TI caregiver burden or AB caregiver burden                    | 4,247   |
| 11                     | TI economic burden or AB economic burden                      | 4,958   |
| 12                     | TI emotional burden or AB emotional burden                    | 987     |
| 13                     | (MH "Health Care Costs+")                                     | 61,717  |
| 14                     | TI cost or AB cost                                            | 163,546 |
| 15                     | (MH "Economic Aspects of Illness")                            | 10,072  |

|    |                                                                                                     |           |
|----|-----------------------------------------------------------------------------------------------------|-----------|
| 16 | (MH "Education+")                                                                                   | 948,231   |
| 17 | (MH "Outcomes of Education")                                                                        | 14,151    |
| 18 | (MH "Occupations and Professions+") or (MH "Employment+")                                           | 143,243   |
| 19 | (MH "Attitude+") or (MH "Personnel Management+")                                                    | 715,705   |
| 20 | (MH "Mental Health")                                                                                | 41,151    |
| 21 | TI human relation or AB human relation                                                              | 969       |
| 22 | (MH "Productivity")                                                                                 | 11,248    |
| 23 | TI social aspect OR AB social aspect                                                                | 4,499     |
| 24 | 5 or 6 or 7 or 8 or 9 or 10 or 11 or 12 or 13 or 14 or 15 or 16 or 18 or 19 or 20 or 21 or 22 or 23 | 1,741,435 |
| 25 | 4 and 24                                                                                            | 1,392     |
| 26 | 5 or 6 or 7 or 8 or 9 or 10 or 11 or 12 or 13 or 14 or 15 or 17 or 18 or 19 or 20 or 21 or 22 or 23 | 1,103,452 |
| 27 | 4 and 26                                                                                            | 534       |

Explanatory notes: \* = truncation wildcard (i.e., unlimited suffix variations); + = explode subject heading; (...) = limiter; "..." = exact phrase; AB = abstract; MH = exact subject heading; TI = title.

Table S11. Cost search terms used in ProQuest.

| Database: ProQuest     |                                                                                          |           |
|------------------------|------------------------------------------------------------------------------------------|-----------|
| Search date: 26-Feb-21 |                                                                                          |           |
| #                      | Search terms                                                                             | Results   |
| 1                      | MAINSUBJECT.EXACT("stuttering")                                                          | 6,150     |
| 2                      | AB(stuttering or stammering or disfluency) or TI(stuttering or stammering or disfluency) | 13,878    |
| 3                      | 1 or 2                                                                                   | 15,128    |
| 4                      | AB(economics) or TI(economics)                                                           | 368,891   |
| 5                      | AB(health resource) or TI(health resource)                                               | 307,910   |
| 6                      | AB(disease burden) or TI(disease burden) or AB(caregiver burden) or TI(caregiver burden) | 185,051   |
| 7                      | AB(economic burden) or TI(economic burden)                                               | 56,629    |
| 8                      | AB(emotional burden) or TI(emotional burden)                                             | 9,914     |
| 9                      | MAINSUBJECT.EXACT("health care expenditures")                                            | 23,951    |
| 10                     | MAINSUBJECT.EXACT("cost")                                                                | 17,285    |
| 11                     | AB(cost) or TI(cost)                                                                     | 4,449,850 |
| 12                     | MAINSUBJECT.EXACT("cost of illness")                                                     | 30,643    |

|    |                                                                                                                                                  |            |
|----|--------------------------------------------------------------------------------------------------------------------------------------------------|------------|
| 13 | MAINSUBJECT(education)                                                                                                                           | 3,101,730  |
| 14 | MAINSUBJECT.EXACT("Academic achievement") or<br>MAINSUBJECT.EXACT("Academic underachievement") or<br>MAINSUBJECT.EXACT("Educational attainment") | 156,203    |
| 15 | MAINSUBJECT(Occupations) or MAINSUBJECT(Employment)                                                                                              | 617,811    |
| 16 | MAINSUBJECT.EXACT("attitudes") or<br>MAINSUBJECT.EXACT("personnel management")                                                                   | 163,449    |
| 17 | MAINSUBJECT.EXACT("mental health")                                                                                                               | 246,652    |
| 18 | MAINSUBJECT.EXACT("human relations")                                                                                                             | 15,322     |
| 19 | MAINSUBJECT.EXACT("productivity")                                                                                                                | 234,137    |
| 20 | AB(social aspect) or TI(social aspect)                                                                                                           | 72,028     |
| 21 | 4 or 5 or 6 or 7 or 8 or 9 or 10 or 11 or 12 or 13 or 15 or 16 or 17 or<br>18 or 19 or 20                                                        | 10,258,536 |
| 22 | 3 and 21                                                                                                                                         | 818        |
| 23 | 4 or 5 or 6 or 7 or 8 or 9 or 10 or 11 or 12 or 13 or 14 or 16 or 17 or<br>18 or 19 or 20                                                        | 7,603,501  |
| 24 | 3 and 23                                                                                                                                         | 449        |

Explanatory notes: \* = truncation (up to 500 word variations); (...) = limiter; "..." = exact phrase; AB = abstract; MAINSUBJECT.EXACT = exact subject heading; TI = title.

Table S12. Cost search terms used in Web of Science.

| Database: Web of Science (All years, 1864-2021) |                                                                                               |           |
|-------------------------------------------------|-----------------------------------------------------------------------------------------------|-----------|
| Search date: 27-Feb-21                          |                                                                                               |           |
| #                                               | Search terms                                                                                  | Results   |
| 1                                               | TS=("fluency disorder*") or TS=(stuttering)                                                   | 9,146     |
| 2                                               | TI=(stuttering or stammering or disfluency) or AB=(stuttering or<br>stammering or disfluency) | 9,293     |
| 3                                               | 1 or 2                                                                                        | 10,434    |
| 4                                               | TI=(economic) or AB=(economic)                                                                | 1,314,049 |
| 5                                               | TI=("health resource*") or AB=("health resource*")                                            | 8,302     |
| 6                                               | TS=("disease burden" or "caregiver burden")                                                   | 29,506    |
| 7                                               | TI=("economic burden") or AB=("economic burden")                                              | 16,123    |
| 8                                               | TI=("emotional burden") or AB=("emotional burden")                                            | 1,046     |
| 9                                               | TS=("health care cost*" or "healthcare cost*")                                                | 80,388    |
| 10                                              | TI=("cost") or AB=("cost")                                                                    | 1,921,726 |
| 11                                              | TS=("cost of illness")                                                                        | 30,415    |

|    |                                                                                                                                           |           |
|----|-------------------------------------------------------------------------------------------------------------------------------------------|-----------|
| 12 | TS=("outcomes of education" or "education outcomes" or "academic achievement" or "academic underachievement" or "educational attainment") | 48,068    |
| 13 | TS=(occupation or employment)                                                                                                             | 460,611   |
| 14 | TI=(attitude or "personnel management") or AB=(attitude or "personnel management")                                                        | 493,853   |
| 15 | TS=(mental health)                                                                                                                        | 580,975   |
| 16 | TS=("human relation*")                                                                                                                    | 9,504     |
| 17 | TS=(productivity)                                                                                                                         | 548,342   |
| 18 | TS=("social aspect*")                                                                                                                     | 60,479    |
| 19 | 4 or 5 or 6 or 7 or 8 or 9 or 10 or 11 or 12 or 13 or 14 or 15 or 16 or 17 or 18                                                          | 5,046,284 |
| 20 | 3 and 19                                                                                                                                  | 807       |

Explanatory notes: \* = wildcard for right hand truncation (any group of suffix characters, including no character); (...) = limiter to override operator precedence; "..." = exact phrase; AB = abstract; TI = title; TS = topic.

Table S13. Cost search terms used in Scopus.

| Database: Scopus (All years) |                                                                                                                                                      |           |
|------------------------------|------------------------------------------------------------------------------------------------------------------------------------------------------|-----------|
| Search date: 02-Mar-21       |                                                                                                                                                      |           |
| #                            | Search terms                                                                                                                                         | Results   |
| 1                            | TITLE-ABS-KEY ("fluency disorder*" or stuttering)                                                                                                    | 8,230     |
| 2                            | TITLE-ABS (stuttering OR stammering or disfluency)                                                                                                   | 7,421     |
| 3                            | 1 or 2                                                                                                                                               | 9,469     |
| 4                            | TITLE-ABS (economic)                                                                                                                                 | 1,335,483 |
| 5                            | TITLE-ABS ("health resource*")                                                                                                                       | 7,926     |
| 6                            | TITLE-ABS-KEY ("disease burden" or "caregiver burden")                                                                                               | 43,876    |
| 7                            | TITLE-ABS ("economic burden")                                                                                                                        | 14,870    |
| 8                            | TITLE-ABS ("emotional burden")                                                                                                                       | 1,168     |
| 9                            | TITLE-ABS-KEY ("health care cost*" or "healthcare cost*")                                                                                            | 209,210   |
| 10                           | TITLE-ABS ("cost")                                                                                                                                   | 2,482,855 |
| 11                           | TITLE-ABS-KEY ("cost of illness")                                                                                                                    | 34,851    |
| 12                           | TITLE-ABS-KEY ("outcomes of education" or "education outcomes" or "academic achievement" or "academic underachievement" or "educational attainment") | 73,056    |

|    |                                                                                  |           |
|----|----------------------------------------------------------------------------------|-----------|
| 13 | TITLE-ABS-KEY (occupation or employment)                                         | 443,479   |
| 14 | TITLE-ABS (attitude or "personnel management")                                   | 460,999   |
| 15 | TITLE-ABS-KEY (mental and health)                                                | 484,748   |
| 16 | TITLE-ABS ("human relation**")                                                   | 7,505     |
| 17 | TITLE-ABS-KEY (productivity)                                                     | 412,547   |
| 18 | TITLE-ABS-KEY ("social aspect**")                                                | 115,313   |
| 19 | 4 or 5 or 6 or 7 or 8 or 9 or 10 or 11 or 12 or 13 or 14 or 15 or 16 or 17 or 18 | 5,364,509 |
| 20 | 3 and 19                                                                         | 761       |

Explanatory notes: \* = wildcard; (...) = limiter; "... = loose phrase (exact words, ignores punctuation); TITLE-ABS = abstract title or abstract; TITLE-ABS-KEY = article title or abstract or keywords.

Table S14. Cost search terms used in the Cochrane Library.

| <b>Database:</b> Cochrane Library (including Cochrane Database of Systematic Reviews and Cochrane Central Register of Controlled Trials) |                                                                                                                                                 |         |
|------------------------------------------------------------------------------------------------------------------------------------------|-------------------------------------------------------------------------------------------------------------------------------------------------|---------|
| <b>Search date:</b> 12-Mar-21                                                                                                            |                                                                                                                                                 |         |
| #                                                                                                                                        | Search terms                                                                                                                                    | Results |
| 1                                                                                                                                        | ("fluency disorder" or stuttering):ti,ab,kw                                                                                                     | 272     |
| 2                                                                                                                                        | (stuttering or stammering or disfluency):ti or (stuttering or stammering or disfluency):ab                                                      | 268     |
| 3                                                                                                                                        | 1 or 2                                                                                                                                          | 287     |
| 4                                                                                                                                        | (economic):ti or (economic):ab                                                                                                                  | 18,767  |
| 5                                                                                                                                        | ("health resource"):ti or ("health resource"):ab                                                                                                | 762     |
| 6                                                                                                                                        | ("disease burden" or "caregiver burden"):ti,ab,kw                                                                                               | 3,110   |
| 7                                                                                                                                        | ("economic burden"):ti or ("economic burden"):ab                                                                                                | 1,050   |
| 8                                                                                                                                        | ("emotional burden"):ti or ("emotional burden"):ab                                                                                              | 100     |
| 9                                                                                                                                        | ("health care cost" or "healthcare cost"):ti,ab,kw                                                                                              | 9,037   |
| 10                                                                                                                                       | ("cost"):ti,ab                                                                                                                                  | 69,665  |
| 11                                                                                                                                       | ("cost of illness"):ti,ab,kw                                                                                                                    | 1,115   |
| 12                                                                                                                                       | ("outcomes of education" or "education outcomes" or "academic achievement" or "academic underachievement" or "educational attainment"):ti,ab,kw | 2,231   |
| 13                                                                                                                                       | (occupation or employment):ti,ab,kw                                                                                                             | 34,867  |
| 14                                                                                                                                       | (attitude or "personnel management"):ti,ab                                                                                                      | 12,689  |
| 15                                                                                                                                       | ("mental health"):ti,ab,kw                                                                                                                      | 20,867  |

|    |                                                                            |         |
|----|----------------------------------------------------------------------------|---------|
| 16 | ("human relation"):ti,ab                                                   | 30      |
| 17 | (productivity):ti,ab,kw                                                    | 82,265  |
| 18 | ("social aspect"):ti,ab,kw                                                 | 762     |
| 19 | 4 or 5 or 6 or 7 or 8 or 9 or 10 11 or 12 or 13 or 14 or 15 or 16 or 17 18 | 212,907 |
| 20 | 3 and 19                                                                   | 77      |

Explanatory notes: (...) = nesting to change search precedence; "..." = phrase search; ab = abstract; kw = keyword; ti = title.

### Search terms using population only

Tables S15 to S19 detail the truncated search terms used for the Paediatric Economic Database Evaluation (PEDE), the National Health Service Economic Evaluation Database (NHS EED), the Australian New Zealand clinical trials registry (ANZCTR), United States National Institutes of Health trial register, and Open Grey.

Table S15. Search terms used in the Paediatric Economic Database Evaluation (PEDE) database.

| Database: PEDE (All years, 1980 - 2019) |                                              |         |
|-----------------------------------------|----------------------------------------------|---------|
| Search date: 02-Mar-21                  |                                              |         |
| #                                       | Search terms                                 | Results |
| 1                                       | TITLE_ABSTRACT_KEYWORDS (stuttering)         | 1       |
| 2                                       | TITLE_ABSTRACT_KEYWORDS (stammering)         | 0       |
| 3                                       | TITLE_ABSTRACT_KEYWORDS (disfluency)         | 0       |
| 4                                       | TITLE_ABSTRACT_KEYWORDS ("fluency disorder") | 0       |
| 5                                       | 1 or 2 or 3 or 4                             | 1       |

Explanatory notes: (...) = limiter; "..." = phrase search.

Table S16. Search terms used in the National Health Service Economic Evaluation Database (NHS EED).

| Database: NHS EED (All years, 1994 - 2015) |  |  |
|--------------------------------------------|--|--|
| Search date: 02-Mar-21                     |  |  |
|                                            |  |  |

| # | Search terms                                       | Results |
|---|----------------------------------------------------|---------|
| 1 | Any field (stuttering or stammering or disfluency) | 13      |
| 2 | Any field ("fluency disorder")                     | 0       |
| 3 | 1 or 2                                             | 13      |

Explanatory notes: (...) = limiter; "... " = phrase search.

Table S17. Search terms used in the Australian New Zealand clinical trials registry (ANZCTR).

| Database: ANZCTR       |                                                                 |         |
|------------------------|-----------------------------------------------------------------|---------|
| Search date: 20-May-21 |                                                                 |         |
|                        |                                                                 |         |
| #                      | Search terms                                                    | Results |
| 1                      | Health condition(s) or problem(s) studied: (stuttering)         | 10      |
| 2                      | Health condition(s) or problem(s) studied: (stammering)         | 0       |
| 3                      | Health condition(s) or problem(s) studied: (disfluency)         | 1       |
| 4                      | Health condition(s) or problem(s) studied: ("fluency disorder") | 0       |
| 5                      | 1 or 2 or 3 or 4                                                | 10      |

Explanatory notes: (...) = limiter; "... " = phrase search.

Table S18. Search terms used in the United States National Institutes of Health trial register (ClinicalTrials.gov).

| Database: United States National Institutes of Health trial register (ClinicalTrials.gov) |                                                              |         |
|-------------------------------------------------------------------------------------------|--------------------------------------------------------------|---------|
| Search date: 20-May-21                                                                    |                                                              |         |
|                                                                                           |                                                              |         |
| #                                                                                         | Search terms                                                 | Results |
| 1                                                                                         | Condition or disease: (stuttering or stutters or stammering) | 34      |
| 2                                                                                         | Condition or disease: (disfluency)                           | 3       |
| 3                                                                                         | Condition or disease: ("fluency disorder")                   | 14      |
| 4                                                                                         | 1 or 2 or 3                                                  | 45      |

Explanatory notes: (...) = limiter; "... " = phrase search.

Table S19. Search terms used in OpenGrey.

| Database: OpenGrey     |  |  |
|------------------------|--|--|
| Search date: 20-May-21 |  |  |

| # | Search terms     | Results |
|---|------------------|---------|
| 1 | stuttering       | 6       |
| 2 | stammering       | 6       |
| 3 | disfluency       | 12      |
| 4 | fluency disorder | 5       |
| 5 | 1 or 2 or 3 or 4 | 28      |
