# Supplementary material
Source: publisher figshare collection journal article supplement (https://asha.figshare.com/articles/dataset/_/24168201)
Supplement: Supplementary file 3 [file 1]

**Supplemental Material S4.** Summary of studies included in the cost of illness analysis.

| Author (Year)                       | Country         | Study design                                                                        | Size (N)                                                 | Cohort   | Male (%)                                    | Population characteristics (stuttering diagnosis, severity, treatment)                                     | Cost outcomes                                                                 | Risk of bias |
|-------------------------------------|-----------------|-------------------------------------------------------------------------------------|----------------------------------------------------------|----------|---------------------------------------------|------------------------------------------------------------------------------------------------------------|-------------------------------------------------------------------------------|--------------|
| <b>Randomized controlled trials</b> |                 |                                                                                     |                                                          |          |                                             |                                                                                                            |                                                                               |              |
| de Sonnevile-Koedoot et al. (2015)  | The Netherlands | Multi-center parallel group RCT                                                     | 199                                                      | Children | Lidcombe Program: 69.4<br>RESTART-DCM: 70.0 | Stuttering severity rating $\geq 2$ ('mild') and stuttered at least 3% of syllables.                       | Health care utilization, direct and indirect costs.                           | High         |
| McAllister et al. (2017)            | Britain         | Two-group parallel design (treatment vs placebo), double-blinded feasibility study. | 31                                                       | Adults   | Treatment: 94<br>Placebo: 67                | Individuals who stutter and have social anxiety disorder.                                                  | Health care utilization, direct costs                                         | Low          |
| <b>Non-randomized studies</b>       |                 |                                                                                     |                                                          |          |                                             |                                                                                                            |                                                                               |              |
| Berchiatti et al. (2020)            | Italy           | Case-control                                                                        | 572 (CWS $n = 62$ , CWNS $n = 474$ , Teachers $n = 36$ ) | Children | CWS: 58.1<br>CWNS: 49.2                     | Stuttering diagnosis made by speech therapist in medical centers.<br>CWS had prior/current formal therapy. | Education (teacher relationships; academic performance), social (friendships) | High         |

| Author (Year)              | Country                      | Study design                 | Size (N)                      | Cohort                     | Male (%)     | Population characteristics (stuttering diagnosis, severity, treatment)                                                                    | Cost outcomes                                                            | Risk of bias |
|----------------------------|------------------------------|------------------------------|-------------------------------|----------------------------|--------------|-------------------------------------------------------------------------------------------------------------------------------------------|--------------------------------------------------------------------------|--------------|
| Blumgart et al. (2010a)    | Australia                    | Cross-sectional <sup>a</sup> | 200                           | Adults                     | 75.5         | Mean (SD) SS = 3.7 (2.8). Mean (SD) perceived stuttering severity = 4.2 (2). 94% had sought prior treatment.                              | Direct and indirect costs, employment                                    | Moderate     |
| Boulet et al. (2009)       | USA                          | Cross-sectional              | 95,132 (CWS <i>n</i> = 1,530) | Children                   | 71.4         | Parent/ guardian report based on clinical diagnosis                                                                                       | Health care utilization, education (special services/early intervention) | Moderate     |
| Boyle (2018)               | USA                          | Cross-sectional              | 324                           | Adults                     | 67           | Self-diagnosed PWS. 95% had prior therapy                                                                                                 | Social (discrimination), employment (recruitment)                        | High         |
| Boyle et al. (1994)        | USA                          | Cross-sectional              | 2,779 (CWS <i>n</i> = 297)    | Children with disabilities | Not reported | Parent/ guardian report                                                                                                                   | Health care utilization, education (school attendance and performance)   | High         |
| Calnan & Richardson (1977) | England, Scotland, and Wales | Cross-sectional              | 11,455 (CWS <i>n</i> = 65)    | Children                   | Not reported | Stuttering 'diagnosed' in three ways: clinician assessment, teacher assessment, speech test. Results based on different diagnosis methods | Education (performance)                                                  | High         |

| Author (Year)           | Country   | Study design                                                         | Size (N)                                                | Cohort                                       | Male (%)                | Population characteristics (stuttering diagnosis, severity, treatment)                                                                                                                                                    | Cost outcomes                                                                                       | Risk of bias |
|-------------------------|-----------|----------------------------------------------------------------------|---------------------------------------------------------|----------------------------------------------|-------------------------|---------------------------------------------------------------------------------------------------------------------------------------------------------------------------------------------------------------------------|-----------------------------------------------------------------------------------------------------|--------------|
| Craig & Calver (1991)   | Australia | Study II: 10-month follow-up of 2 non-randomized experimental trials | 62                                                      | Adults                                       | Not reported            | Craig 1984: AWS<br>Craig 1985: AWS, mean %SS = 12.9<br><br>All participants were successfully treated with smooth speech prior to 10-month follow-up.                                                                     | Employment (promotion, career improvement)                                                          | High         |
| Erickson & Block (2013) | Australia | Cross-sectional                                                      | 36                                                      | Adolescents                                  | 77.8                    | Mean (SD) stuttering frequency 6.9% (5.7%)<br>SS, range = 2.1–26.8%<br><br>Mean (SD) onset: 8.5 (3.0). Previously received treatment: 30 (84%).<br><br>Major treatment type: speech restructuring (63% of those treated). | Education (avoid school, affected schoolwork), social (teasing/bullying, exclusion), indirect costs | High         |
| Franic et al. (2012)    | USA       | Cross-sectional                                                      | 80 (included $n = 78$ , history of stuttering $n = 4$ ) | Adults                                       | 17.9%                   | Not discussed                                                                                                                                                                                                             | Direct and indirect costs (willingness to pay)                                                      | High         |
| Gerlach et al. (2018)   | USA       | Cohort                                                               | 20,745 (included $n = 13,564$ , PWS $n = 261$ )         | Stuttered in adolescence, outcomes as adults | PWS: 64.8<br>PWNS: 47.5 | PWS: 84% of respondents described their stuttering as "mild"; 15%, as "moderate"; and less than 1%, as "severe."                                                                                                          | Employment (earnings, employment status)                                                            | Moderate     |

| Author (Year)             | Country | Study design    | Size (N)                                                     | Cohort                                         | Male (%) | Population characteristics (stuttering diagnosis, severity, treatment)                                                                                                             | Cost outcomes                                                                                               | Risk of bias |
|---------------------------|---------|-----------------|--------------------------------------------------------------|------------------------------------------------|----------|------------------------------------------------------------------------------------------------------------------------------------------------------------------------------------|-------------------------------------------------------------------------------------------------------------|--------------|
| Hayhow et al. (2002)      | UK      | Cross-sectional | 332                                                          | Adolescents and adults (age range 16–86 years) | 71       | Self-reported severity (10-point scale, 1=mild and 10=severe). 264 (80%) rating their stammering as "mild" (1–3) on a good day. Bad day 8% (1–3), 15% (4–5), 32% (6–7), 45% (8–10) | Education (performance), employment (occupation choice, promotion), social (friendships, romantic partners) | High         |
| Hugh-Jones & Smith (1999) | UK      | Cross-sectional | 276                                                          | Adolescents or adults                          | 75.7     | Not discussed                                                                                                                                                                      | Education (attendance, performance), employment (performance), social (relationships)                       | High         |
| Iimura & Miyamoto (2022)  | Japan   | Cross-sectional | 112 (included $n = 110$ , AWS without comorbidity $n = 52$ ) | Adults                                         | 82.7     | Participates in self-help group: 5% no, 18% rarely, 30% sometimes, 35% often, 12% almost always.                                                                                   | Employment (self-rated job difficulties)                                                                    | High         |
| Klein & Hood (2004)       | USA     | Cross-sectional | 232                                                          | Adults                                         | 71.1     | Self-rated severity: 33 (14%) very mild, 72 (31%) mild, 103 (44%) moderate, 20 (9%) severe, 4 (<2%) very severe.<br><br>91% had been enrolled in speech therapy at one time.       | Employment (performance, promotion)                                                                         | High         |

| Author (Year)            | Country                   | Study design    | Size (N)                                                                                                    | Cohort                                       | Male (%)                                                          | Population characteristics (stuttering diagnosis, severity, treatment)                                                                                                                 | Cost outcomes                                                             | Risk of bias |
|--------------------------|---------------------------|-----------------|-------------------------------------------------------------------------------------------------------------|----------------------------------------------|-------------------------------------------------------------------|----------------------------------------------------------------------------------------------------------------------------------------------------------------------------------------|---------------------------------------------------------------------------|--------------|
| McAllister et al. (2012) | UK                        | Cohort          | 18,558 (no stutter at age 16 and no history of speech problems $n = 15,694$ , stutter at age 16 $n = 217$ ) | Stuttered in adolescence, outcomes as adults | PWS: 78.7 to 86.6 <sup>b</sup><br>PWNS: 47.1 to 67.6 <sup>b</sup> | CWS identified by parent report                                                                                                                                                        | Educational (attainment), employment (status and income)                  | Moderate     |
| McClure & Yaruss (2003)  | USA                       | Cross-sectional | 642 (AWS $n = 544$ , parents of CWS $n = 98$ )                                                              | Children, adolescents, and adults            | Not reported                                                      | Prior treatment: of those who had received treatment, 85% had $\geq 2$ experiences.<br><br>All survey respondents were NSA members, <50% had attended convention, workshop, or meeting | Education (performance), employment (performance, promotion, recruitment) | Critical     |
| O'Brian et al. (2011)    | Australia and New Zealand | Cross-sectional | 147                                                                                                         | Adults                                       | 78.9                                                              | Stuttering confirmed by SLP.<br><br>123 (81.6%) had previously received treatment for stuttering.                                                                                      | Education (achievement)                                                   | High         |
| Palasik (2012)           | USA                       | Cross-sectional | 184                                                                                                         | Adults                                       | 72.8                                                              | Self-rated stuttering severity: 51% mild, 41% moderate, 8% severe. 21% currently in therapy,                                                                                           | Employment (performance, career development)                              | High         |

| Author (Year)         | Country                                                                                    | Study design    | Size (N)                            | Cohort                                       | Male (%)                | Population characteristics (stuttering diagnosis, severity, treatment)                                                                                                                                                                             | Cost outcomes                                                  | Risk of bias |
|-----------------------|--------------------------------------------------------------------------------------------|-----------------|-------------------------------------|----------------------------------------------|-------------------------|----------------------------------------------------------------------------------------------------------------------------------------------------------------------------------------------------------------------------------------------------|----------------------------------------------------------------|--------------|
|                       |                                                                                            |                 |                                     |                                              |                         | 90% have had therapy at any stage                                                                                                                                                                                                                  |                                                                |              |
| Plexico et al. (2019) | USA (Geographic locations not equally distributed between PWS and PWNS groups $p = .000$ ) | Cross-sectional | 164 (PWS $n = 72$ , PWNS $n = 92$ ) | Adults                                       | PWS: 63.4<br>PWNS: 34.1 | On a 1-10 (worst) scale, mean (SD) severity: 5.17 (2.37)<br><br>86% had some past treatment for stuttering. 40% had received treatment $\geq 4$ times. 74% of those receiving prior treatment experienced relapse.<br><br>60% were members of NSA. | Employment (roles, career progression, income, discrimination) | High         |
| Rees & Sabia (2014)   | USA                                                                                        | Cohort          | 15,170 (analyzed $n = 13,549$ )     | Stuttered in adolescence, outcomes as adults | PWS: 57.8<br>PWNS: 45.5 | Self-reported stutter. 7% answered affirmative in Wave III ( $n \approx 948$ ).                                                                                                                                                                    | Education (achievement, attainment)                            | Moderate     |
| Rice (1994)           | Canada                                                                                     | Cross-sectional | >250                                | Not reported                                 | Not reported            | Not discussed                                                                                                                                                                                                                                      | Employment                                                     | Critical     |
| Rice & Kroll (2006)   | USA ( $n = 239$ ), Britain ( $n = 64$ ), Canada ( $n = 32$ ), Australia                    | Cross-sectional | 412                                 | Adults                                       | 71.6                    | Stuttering severity: mild (39%), moderate (54%) severe (7%).                                                                                                                                                                                       | Employment                                                     | High         |

| Author (Year)             | Country                                                                                             | Study design    | Size (N)                                                                                                                  | Cohort                                      | Male (%)        | Population characteristics (stuttering diagnosis, severity, treatment)                                                                                          | Cost outcomes              | Risk of bias |
|---------------------------|-----------------------------------------------------------------------------------------------------|-----------------|---------------------------------------------------------------------------------------------------------------------------|---------------------------------------------|-----------------|-----------------------------------------------------------------------------------------------------------------------------------------------------------------|----------------------------|--------------|
|                           | ( <i>n</i> = 24),<br>India ( <i>n</i> = 13), other<br>( <i>n</i> = 40).<br>32<br>countries<br>total |                 |                                                                                                                           |                                             |                 |                                                                                                                                                                 |                            |              |
| Rosenbaum<br>(2018)       | USA                                                                                                 | Case-control    | 9,909<br>enrolled in<br>community<br>college <i>n</i> =<br>1494,<br>enrolled in<br>4-year<br>college <i>n</i> =<br>2,721) | Adults                                      | 39.6            | Self-reported stutter:<br>7.2% overall ( <i>n</i> = 714),<br>8.1% not attending<br>college, 7.0% attending<br>community college, 5.5%<br>attending 4-yr college | Education<br>(attainment)  | Moderate     |
| Sommer et al.<br>(2021)   | Germany                                                                                             | Cross-sectional | 27,977                                                                                                                    | Children,<br>adolescent<br>s, and<br>adults | 75              | Confirmed outpatient<br>diagnosis (ICD-10 code<br>recorded in insurer<br>database)                                                                              | Healthcare<br>utilization  | High         |
| Werle & Byrd<br>(2022)    | USA                                                                                                 | Cross-sectional | 158                                                                                                                       | College<br>instructors                      | Not<br>reported | Instructors who teach or<br>evaluate oral<br>presentations in<br>university foundational<br>oral communications<br>courses within last 5 yrs.                   | Education<br>(performance) | Moderate     |
| Williams et al.<br>(1969) | USA                                                                                                 | Case-control    | 1.<br>400<br>(CWS <i>n</i> =                                                                                              | Children                                    | 87              | Names of CWS<br>submitted by SLP                                                                                                                                | Education<br>(performance) | Moderate     |

| Author (Year)               | Country   | Study design                               | Size (N)                                                                          | Cohort | Male (%)               | Population characteristics (stuttering diagnosis, severity, treatment)                                                                                            | Cost outcomes                         | Risk of bias |
|-----------------------------|-----------|--------------------------------------------|-----------------------------------------------------------------------------------|--------|------------------------|-------------------------------------------------------------------------------------------------------------------------------------------------------------------|---------------------------------------|--------------|
|                             |           |                                            | 100, CWNS $n = 300$ ).<br>2.<br>200<br>(male CWS $n = 50$ , male CWNS $n = 150$ ) |        |                        |                                                                                                                                                                   |                                       |              |
| <b>Qualitative research</b> |           |                                            |                                                                                   |        |                        |                                                                                                                                                                   |                                       |              |
| Beilby et al. (2013)        | Unclear   | Mixed method (questionnaires, interviews). | 20                                                                                | Adults | PWS: 90<br>Partner: 10 | Clinical diagnosis of stuttering confirmed by a SLP with $\geq 10$ years of experience in assessment and treatment of fluency disorders;                          | Social (romantic partner)             | Lower        |
| Boberg & Boberg (1990)      | Canada    | Interviews                                 | 15                                                                                | Adults | 0                      | Non-stuttering wives of PWS. 7/15 husbands completed 3wk intensive stuttering program, 3 completed precision fluency program, 3 avoidance reduction, 2 no therapy | Social (family)                       | Higher       |
| Bricker-Katz et al. (2013)  | Australia | Interviews                                 | 9                                                                                 | Adults | 66.6                   | Stuttering severity: 2 severe, 3 moderate, 1 mod/mild, 3 mild.<br>Treatment history: 2 current, 3 intermittent/not                                                | Employment (occupational progression) | Lower        |

| Author (Year)         | Country                                   | Study design                                                    | Size (N) | Cohort                                                   | Male (%)     | Population characteristics (stuttering diagnosis, severity, treatment)                                                                         | Cost outcomes                                                  | Risk of bias |
|-----------------------|-------------------------------------------|-----------------------------------------------------------------|----------|----------------------------------------------------------|--------------|------------------------------------------------------------------------------------------------------------------------------------------------|----------------------------------------------------------------|--------------|
|                       |                                           |                                                                 |          |                                                          |              | current, 3 never, 1 early childhood                                                                                                            |                                                                |              |
| Butler (2013)         | UK                                        | Interviews, focus groups                                        | 38       | Adults                                                   | Just over 80 | Typically experiencing dysfluency from age 5yrs                                                                                                | Education (academic achievement, progression)                  | Lower        |
| Butler (2014)         | UK                                        | Interviews, focus groups, conversations                         | 36       | Adults                                                   | 100          | Diagnosis/ severity not discussed.                                                                                                             | Education (achievement), employment (aspirations, recruitment) | Lower        |
| Crichton-Smith (2002) | UK                                        | Interviews                                                      | 14       | Adults                                                   | 78.6         | 13 persistent developmental stuttering, 1 acquired stammer. Previous therapy: 2/14 never, 3/14 as child, 4/14 as adult, 5/14 as child + adult. | Education (attainment), employment                             | Lower        |
| Georges (2017)        | USA ( <i>n</i> = 9)<br>NZ ( <i>n</i> = 1) | Interviews                                                      | 10       | Adults                                                   | 0            | Not described                                                                                                                                  | Employment, social, direct and indirect costs                  | Lower        |
| Johnson (1934)        | USA                                       | Mixed method (interviews, questionnaires, clinical examination) | 80       | Children, adolescents, and adults (age range 7–42 years) | 76.3         | Greater proportion of severe cases among boys than girls.                                                                                      | Education (attainment), employment (occupation choice)         | Higher       |

| Author (Year)             | Country   | Study design      | Size (N)                                             | Cohort | Male (%)                   | Population characteristics (stuttering diagnosis, severity, treatment)                                                                                                                                     | Cost outcomes                                             | Risk of bias |
|---------------------------|-----------|-------------------|------------------------------------------------------|--------|----------------------------|------------------------------------------------------------------------------------------------------------------------------------------------------------------------------------------------------------|-----------------------------------------------------------|--------------|
|                           |           | autobiographies). |                                                      |        |                            |                                                                                                                                                                                                            |                                                           |              |
| Leko Krhen et al. (2021)  | Croatia   | Interviews        | 6                                                    | Adults | 0                          | Self-report. PWS >5 yrs. Half perceived stuttering moderate at onset, remainder severe. Stutter onset: half <6rs, remainder 6–10 yrs.                                                                      | Education, employment, social                             | Higher       |
| Nang et al. (2018)        | Australia | Interviews        | 9                                                    | Adults | 0                          | Stuttering severity: 5 mild, 2 mild-moderate, 2 moderate.<br>All started stuttering in childhood and had received some SLP intervention. Support group membership: 3 < 10yrs, 4 10-20 years, 2 > 30 years. | Social (romantic relationships), employment (recruitment) | Lower        |
| Silverman & Zimmer (1982) | US        | Interviews        | 20<br>(Group 1 <i>n</i> = 10, Group 2 <i>n</i> = 10) | Adults | Group 1: 0<br>Group 2: 100 | Some parent, self, teachers, relative, or friend-diagnosed (no mention of clinical diagnosis).<br>Stutter onset: 4yrs women, 6.2yrs men.<br>Treatment onset: 11.4yrs w, 9.8yr m.                           | Education, employment, social, healthcare utilization     | Higher       |

AWS = adults who stutter; BSA = British Stuttering Association; CWNS = children who do not stutter; CWS = children who stutter; DCM = Demands and Capacities Model; LP = Lidcombe Program; NSA = National Stuttering Association; NZ = New Zealand; PWNS = people who do not stutter; PWS = people

who stutter; RCT = Randomized Controlled Trial; *SD* = standard deviation; SLP = speech-language pathologist; SS = sample size; UK = United Kingdom; USA = United States of America; yrs. = years.

<sup>a</sup> This study is described by the authors as a population group cohort study. However, it specifically recruited PWS so has been classified as a cross-sectional study in this review.

<sup>b</sup> Proportion of males was presented by outcome variable (e.g., highest qualification at 50 years, unemployment at 23 years, pay at age 23)
