# Supplementary material
Source: publisher figshare collection journal article supplement (https://asha.figshare.com/articles/dataset/_/24168201)
Supplement: Supplementary file 4 [file 1]

### Supplemental Material S3. Risk of bias for the quality of life and cost studies.

Details of the risk of bias for the quality of life and cost studies using (i) the Rob 2 tool (Sterne et al., 2019) for randomized trials, (ii) the ROBINS-I tool (Sterne et al., 2016) for non-randomized studies, and (iii) the CASP qualitative studies checklist (Critical Appraisal Skills Programme, 2018) for qualitative research.

#### (i) Randomized trials.

|                                    | Randomization | Deviations from intended interventions | Missing outcome data | Measurement of outcomes | Selection of reported result | Overall score |
|------------------------------------|---------------|----------------------------------------|----------------------|-------------------------|------------------------------|---------------|
| de Sonnevile-Koedoot et al. (2015) | High          | Low                                    | Low                  | Some concerns           | Low                          | High          |
| McAllister et al. (2017)           | Low           | Low                                    | Low                  | Low                     | Low                          | Low           |

#### (ii) Non-randomized trials.

|                          | Confounding | Participant selection | Classification of interventions | Deviations from intended intervention | Missing data | Measurement of outcomes | Selection of reported result | Overall score |
|--------------------------|-------------|-----------------------|---------------------------------|---------------------------------------|--------------|-------------------------|------------------------------|---------------|
| Berchiatti et al. (2020) | High        | Low                   | Not applicable                  | Not applicable                        | Low          | Low                     | Low                          | High          |
| Blumgart et al. (2010a)  | Moderate    | Low                   | Not applicable                  | Not applicable                        | Low          | Moderate                | Low                          | Moderate      |

|                            |          |     |                |                |                |     |     |          |
|----------------------------|----------|-----|----------------|----------------|----------------|-----|-----|----------|
| Boulet et al. (2009)       | Moderate | Low | Not applicable | Not applicable | Moderate       | Low | Low | Moderate |
| Boyle (2018)               | High     | Low | Not applicable | Not applicable | High           | Low | Low | High     |
| Boyle et al. (1994)        | High     | Low | Not applicable | Not applicable | Moderate       | Low | Low | High     |
| Calnan & Richardson (1977) | High     | Low | Not applicable | Not applicable | Low            | Low | Low | High     |
| Craig & Calver (1991)      | High     | Low | Low            | Low            | High           | Low | Low | High     |
| Erickson & Block (2013)    | High     | Low | Not applicable | Not applicable | Low            | Low | Low | High     |
| Franic et al. (2012)       | High     | Low | Not applicable | Not applicable | Moderate       | Low | Low | High     |
| Gerlach et al. (2018)      | Moderate | Low | Not applicable | Not applicable | No information | Low | Low | Moderate |
| Hayhow et al. (2002)       | High     | Low | Not applicable | Not applicable | Low            | Low | Low | High     |
| Hugh-Jones & Smith (1999)  | High     | Low | Not applicable | Not applicable | Low            | Low | Low | High     |

|                          |          |                |                |                |                |      |      |          |
|--------------------------|----------|----------------|----------------|----------------|----------------|------|------|----------|
| Iimura & Miyamoto (2022) | High     | Low            | Not applicable | Not applicable | Moderate       | Low  | Low  | High     |
| Klein & Hood (2004)      | High     | Low            | Not applicable | Not applicable | No information | Low  | Low  | High     |
| McAllister et al. (2012) | Moderate | Low            | Not applicable | Not applicable | Moderate       | Low  | Low  | Moderate |
| McClure & Yaruss (2003)  | High     | Low            | Not applicable | Not applicable | No information | Low  | High | Critical |
| O'Brian et al. (2011)    | High     | Low            | Not applicable | Not applicable | Low            | Low  | Low  | High     |
| Omori et al. (2021)      | High     | Low            | Low            | Moderate       | High           | High | Low  | High     |
| Palasik (2012)           | High     | Low            | Not applicable | Not applicable | No information | Low  | Low  | High     |
| Plexico et al. (2019)    | High     | Low            | Not applicable | Not applicable | Low            | Low  | Low  | High     |
| Rees & Sabia (2014)      | Moderate | Low            | Not applicable | Not applicable | Moderate       | Low  | Low  | Moderate |
| Rice (1994)              | High     | No information | Not applicable | Not applicable | No information | Low  | High | Critical |
| Rice & Kroll (2006)      | High     | Low            | Not applicable | Not applicable | No information | Low  | Low  | High     |

|                        |          |     |                |                |                |     |     |          |
|------------------------|----------|-----|----------------|----------------|----------------|-----|-----|----------|
| Rosenbaum (2018)       | Moderate | Low | Not applicable | Not applicable | Moderate       | Low | Low | Moderate |
| Sommer et al. (2021)   | High     | Low | Not applicable | Not applicable | Low            | Low | Low | High     |
| Werle & Byrd (2022)    | Moderate | Low | Not applicable | Not applicable | Moderate       | Low | Low | Moderate |
| Williams et al. (1969) | Moderate | Low | Not applicable | Not applicable | No information | Low | Low | Moderate |

(iii) Qualitative research.

|                            | Clear research aim | Appropriate methodology | Appropriate design | Appropriate recruitment | Appropriate data selection | Researcher-participant relationship considered | Ethical issues considered | Rigorous data analysis | Statement of findings | Valuable research | Overall |
|----------------------------|--------------------|-------------------------|--------------------|-------------------------|----------------------------|------------------------------------------------|---------------------------|------------------------|-----------------------|-------------------|---------|
| Beilby et al. (2013)       | Yes                | Yes                     | Yes                | Unclear                 | Yes                        | Unclear                                        | Yes                       | Yes                    | Yes                   | Yes               | Lower   |
| Boberg & Boberg (1990)     | Yes                | Yes                     | Unclear            | Unclear                 | Yes                        | Unclear                                        | No                        | Unclear                | Yes                   | Yes               | Higher  |
| Bricker-Katz et al. (2013) | Yes                | Yes                     | Yes                | Yes                     | Yes                        | Yes                                            | Yes                       | Yes                    | Yes                   | Yes               | Lower   |
| Butler (2013)              | Yes                | Yes                     | Yes                | Yes                     | Yes                        | Unclear                                        | Yes                       | Yes                    | Yes                   | Yes               | Lower   |

|                           |     |     |         |         |         |         |         |         |     |     |        |
|---------------------------|-----|-----|---------|---------|---------|---------|---------|---------|-----|-----|--------|
| Butler (2014)             | Yes | Yes | Yes     | Yes     | Yes     | Unclear | Unclear | Yes     | Yes | Yes | Lower  |
| Crichton-Smith (2002)     | Yes | Yes | Yes     | Yes     | Yes     | Unclear | Yes     | Yes     | Yes | Yes | Lower  |
| Georges (2017)            | Yes | Yes | Yes     | Yes     | Yes     | Yes     | Yes     | Yes     | Yes | Yes | Lower  |
| Johnson (1934)            | Yes | Yes | Yes     | Unclear | Unclear | No      | No      | Unclear | Yes | Yes | Higher |
| Leko Krhen et al. (2021)  | Yes | Yes | Unclear | No      | Yes     | No      | Unclear | Yes     | Yes | Yes | Higher |
| Nang et al. (2018)        | Yes | Yes | Unclear | Yes     | Yes     | Unclear | Yes     | Yes     | Yes | Yes | Lower  |
| Silverman & Zimmer (1982) | Yes | Yes | Unclear | No      | Unclear | No      | No      | No      | Yes | Yes | Higher |
